# Supplementary material
Source: bioRxiv or medRxiv preprint supplement (https://www.biorxiv.org/highwire/filestream/103163/field_highwire_adjunct_files/0/338939-1.pdf)
Supplement: Supplementary file [file 338939-1.pdf]

Supplementary Information for:

**Absolute quantification of translational regulation and burden using combined sequencing approaches**

Thomas E. Gorochowski, Irina Chelysheva, Mette Eriksen, Priyanka Nair, Steen Pedersen, Zoya Ignatova

| <b>Supplementary Figures</b>                                                                                        | <b>Page</b> |
|---------------------------------------------------------------------------------------------------------------------|-------------|
| Figure S1: Sequencing data exhibit a good correlation between biological replicates                                 | 2           |
| Figure S2: Comparison of ribosome protected fragments (RPFs) mapping to first and second half of each coding region | 3           |
| <b>Supplementary Tables</b>                                                                                         |             |
| Table S1: Measurements of cellular parameters                                                                       | 4           |
| Table S2: Sequencing and read mapping statistics                                                                    | 5           |

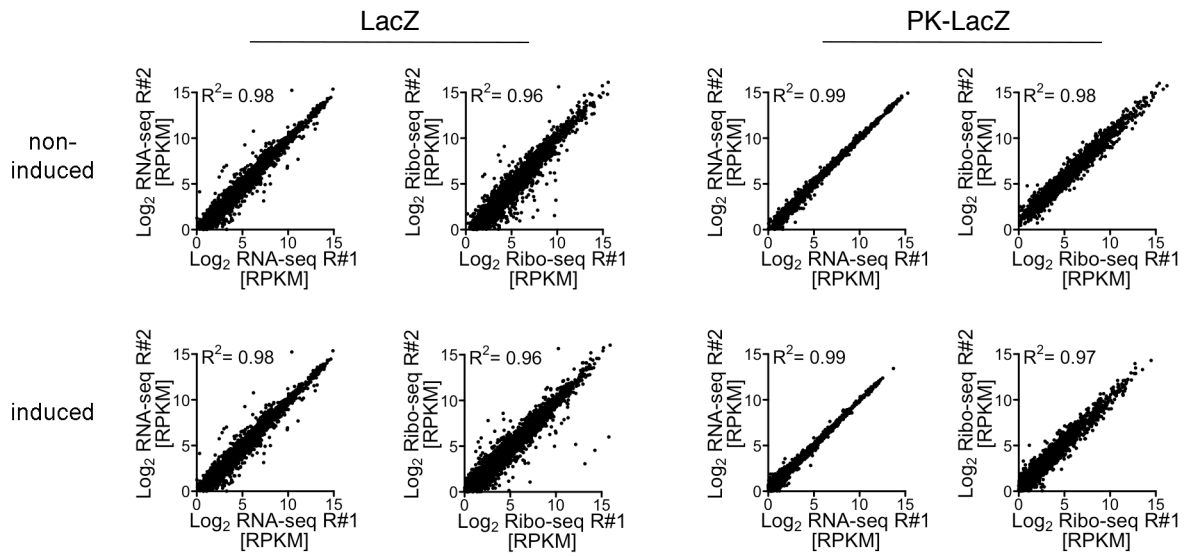

**Figure S1: Sequencing data exhibit a good correlation between biological replicates.** Correlation of the RNA-seq and Ribo-seq data of two biological replicates from induced and non-induced cells expressing either LacZ or LacZ-PK.  $R^2$ , Pearson correlation coefficient.

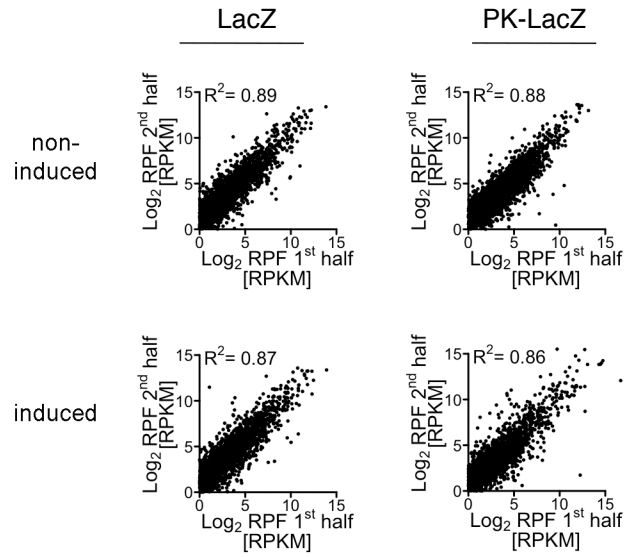

**Figure S2: Comparison of ribosome protected fragments (RPFs) mapping to first and second half of each coding region.** Each point represents a coding region. First 51 bp and last 9 bp not included in the calculation. R<sup>2</sup>, Pearson correlation coefficient.

**Table S1: Measurements of cellular parameters**

| Measurement                           | Start of induction     |                        | End of induction <sup>a</sup> |                        |
|---------------------------------------|------------------------|------------------------|-------------------------------|------------------------|
|                                       | LacZ                   | PK-LacZ                | LacZ                          | PK-LacZ                |
| Doubling time (minutes)               | 85                     | 85                     | – <sup>b</sup>                | – <sup>b</sup>         |
| Cell count                            | $1.6 \times 10^9$      | $1.6 \times 10^9$      | $1.6 \times 10^9$             | $1.6 \times 10^9$      |
| Protein mass (grams/cell)             | $4.13 \times 10^{-13}$ | $4.10 \times 10^{-13}$ | $4.70 \times 10^{-13}$        | $4.30 \times 10^{-13}$ |
| Mass of LacZ/PK-LacZ as total of cell | –                      | –                      | 14%                           | 5.8%                   |

a. Induction of constructs lasted 10 min for LacZ and 15 min for PK-LacZ before samples were taken.

b. No measurable growth during the induction period.

**Table S2: Sequencing and read mapping statistics**

| Sample <sup>a</sup> |          |             |     | Total # of reads <sup>b</sup> | Multi-mapped reads <sup>c</sup> | Non-coding <sup>c</sup> | Uniquely mapped to mRNA <sup>c</sup> |
|---------------------|----------|-------------|-----|-------------------------------|---------------------------------|-------------------------|--------------------------------------|
| PK-LacZ             | RNA-seq  | non-induced | R#1 | 66066771                      | 29796556<br>(45.10%)            | 2876188<br>(4.35%)      | 33394027<br>(50.55%)                 |
| PK-LacZ             | RNA-seq  | non-induced | R#2 | 39198111                      | 18025740<br>(45.99%)            | 1673252<br>(4.27%)      | 19499119<br>(49.75%)                 |
| PK-LacZ             | RNA-seq  | induced     | R#1 | 70004102                      | 28545341<br>(40.78%)            | 1982506<br>(2.83%)      | 39476255<br>(56.39%)                 |
| PK-LacZ             | RNA-seq  | induced     | R#2 | 68146152                      | 27782049<br>(40.77%)            | 1931069<br>(2.83%)      | 38433034<br>(56.40%)                 |
| PK-LacZ             | Ribo-seq | non-induced | R#1 | 59384989                      | 25736660<br>(43.34%)            | 3034480<br>(5.11%)      | 30613849<br>(51.55%)                 |
| PK-LacZ             | Ribo-seq | non-induced | R#2 | 62798001                      | 23567687<br>(37.53%)            | 6009235<br>(9.57%)      | 33221079<br>(52.90%)                 |
| PK-LacZ             | Ribo-seq | induced     | R#1 | 56568122                      | 27566889<br>(48.73%)            | 2387216<br>(4.22%)      | 26614017<br>(47.05%)                 |
| PK-LacZ             | Ribo-seq | induced     | R#2 | 54581989                      | 20143633<br>(36.91%)            | 3541469<br>(6.49%)      | 30896887<br>(56.61%)                 |
| LacZ                | RNA-seq  | non-induced | R#1 | 192586734                     | 90755510<br>(47.12%)            | 7758247<br>(4.03%)      | 94072977<br>(48.85%)                 |
| LacZ                | RNA-seq  | non-induced | R#2 | 53735584                      | 28463851<br>(52.97%)            | 3382171<br>(6.29%)      | 21889562<br>(40.74%)                 |
| LacZ                | RNA-seq  | induced     | R#1 | 190867334                     | 91396079<br>(47.88%)            | 6916496<br>(3.62%)      | 92554759<br>(48.49%)                 |
| LacZ                | RNA-seq  | induced     | R#2 | 52249590                      | 25660126<br>(49.11%)            | 2776669<br>(5.31%)      | 23812795<br>(45.58%)                 |
| LacZ                | Ribo-seq | non-induced | R#1 | 183013690                     | 124093781<br>(67.81%)           | 11347972<br>(6.20%)     | 47571937<br>(25.99%)                 |
| LacZ                | Ribo-seq | non-induced | R#2 | 53330842                      | 25579314<br>(47.96%)            | 4072967<br>(7.64%)      | 23678561<br>(44.40%)                 |
| LacZ                | Ribo-seq | induced     | R#1 | 199707963                     | 120352995<br>(60.26%)           | 7716217<br>(3.86%)      | 71638751<br>(35.87%)                 |
| LacZ                | Ribo-seq | induced     | R#2 | 41870343                      | 31443591<br>(75.10%)            | 1843808<br>(4.40%)      | 8582944<br>(20.50%)                  |

a. Biological replicates are denoted “R#1” and “R#2” and “induced” relates to presence of IPTG (1 mM).

b. Reads aligning to more than one sequence including tRNA and rRNA were excluded from the data.

c. Sequencing reads were mapped to the genome of *E. coli* K-12 MG1655 strain.
